# Supplementary material for: Sex-Specific Selection and Sex-Biased Gene Expression in Humans and Flies
Source: PLOS journal article supplement (doi:10.1371/journal.pgen.1006170), 2016-09-22
Supplement: S9 (10.1371/journal.pgen.1006170.s009) [file journal.pgen.1006170.s009]

| Models | AIC | Likelihood ratio test $p$ -value<br>(vs. 4 <sup>th</sup> degree model) |
|--------|-----|------------------------------------------------------------------------|
| 0      | 3   | 0.024                                                                  |
| 1      | 5   | 0.006                                                                  |
| 2      | -   | -                                                                      |
| 3      | 1   | 0.26                                                                   |
| 4      | 2   | 0.48                                                                   |
